# Supplementary material for: Galactooligosaccharides ameliorate dietary advanced glycation end product-induced intestinal barrier damage in C57BL/6 mice by modulation of the intestinal microbiome
Source: Royal Society of Chemistry journal article supplement (doi:10.1039/d2fo02959f), 2022-12-07

### Electronic Supplementary Information

Figure S1. Representative western blot images of colonic occludin and GAPDH proteins.

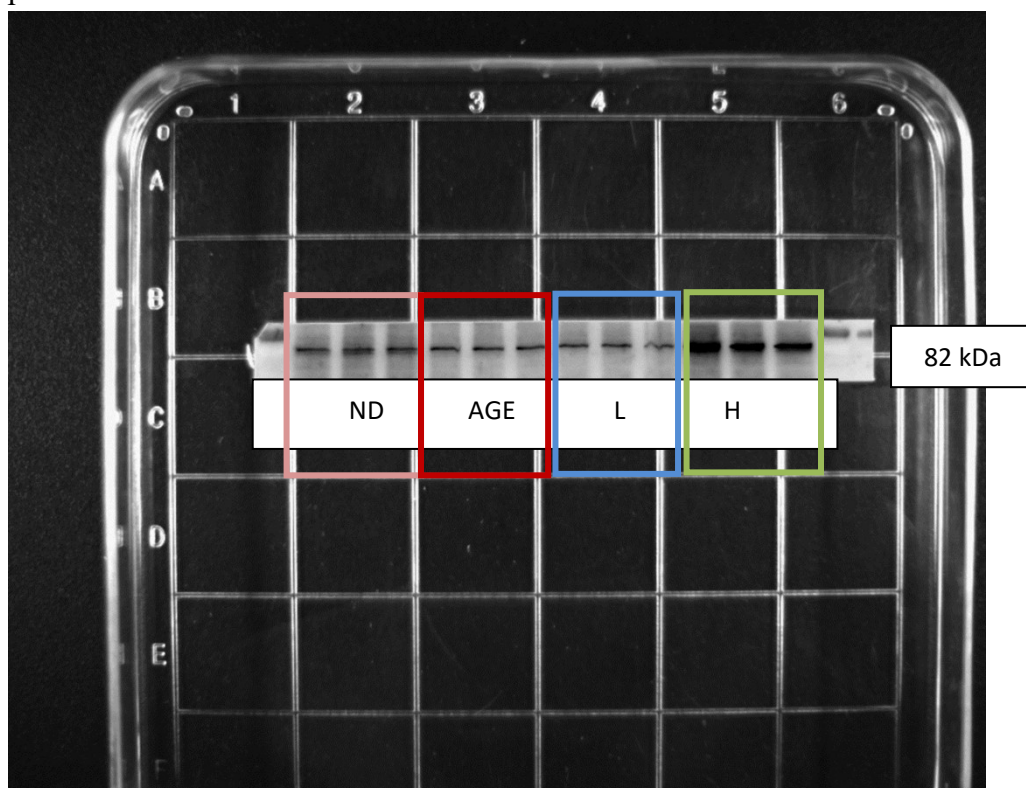

Figure S2. Representative western blot images of colonic GAPDH proteins.

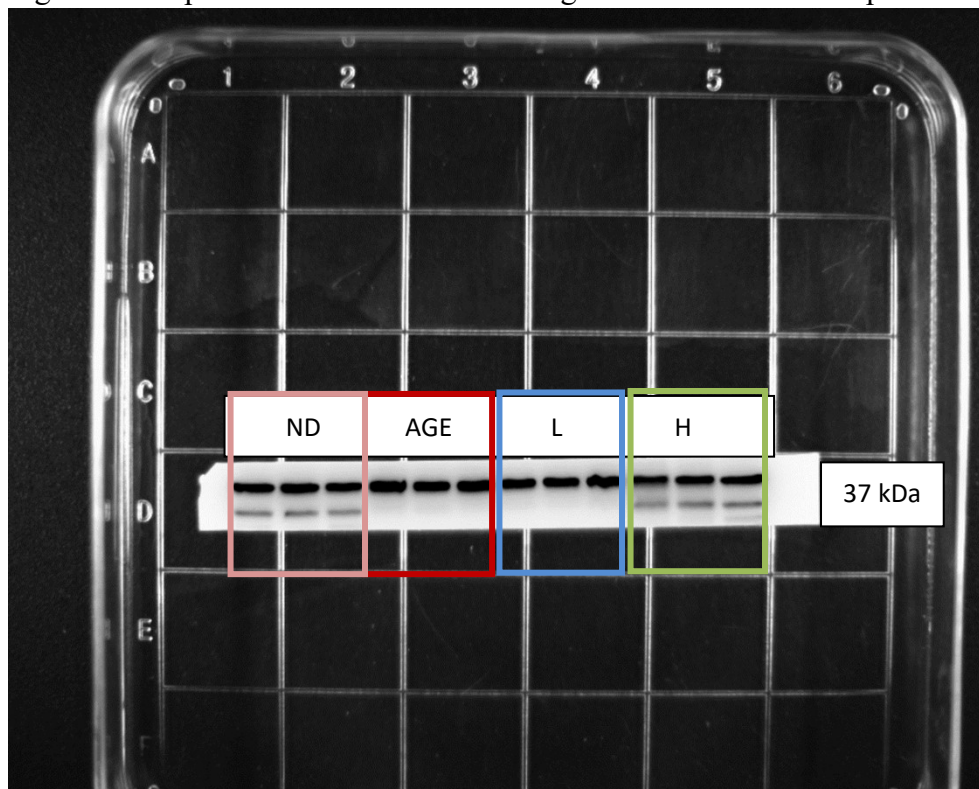

Figure S3. Representative western blot images of colonic Claudin-1 proteins.

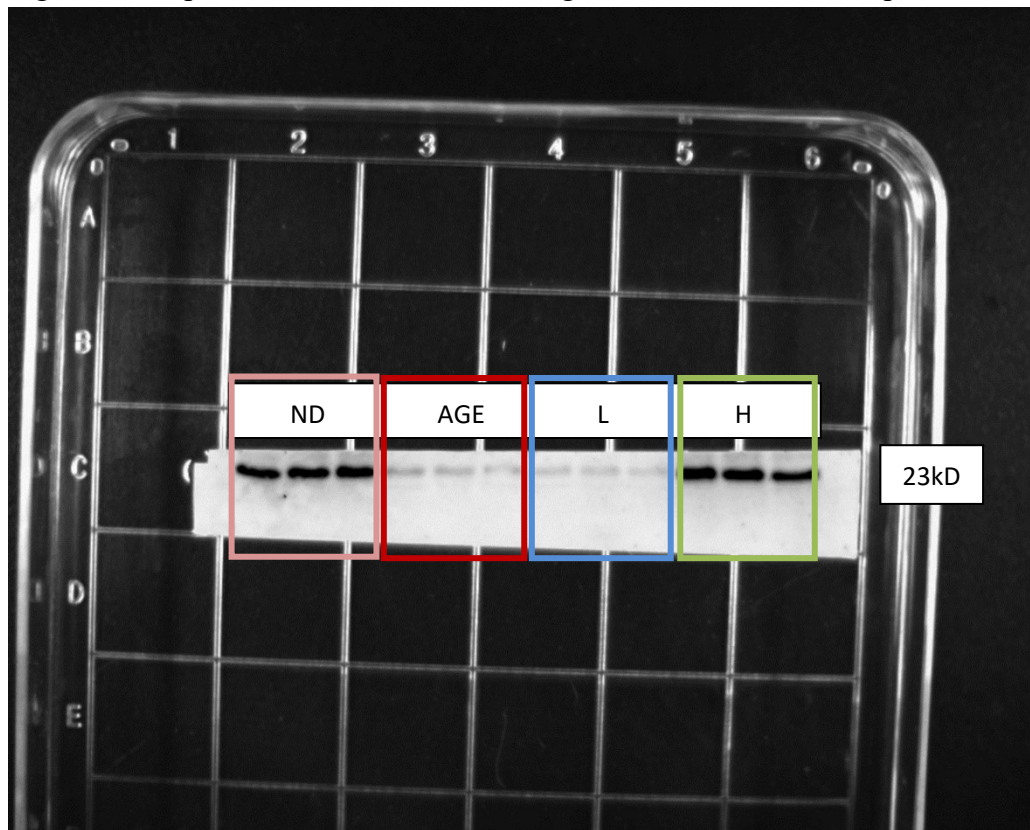

Figure S4. Representative western blot images of colonic GAPDH proteins.

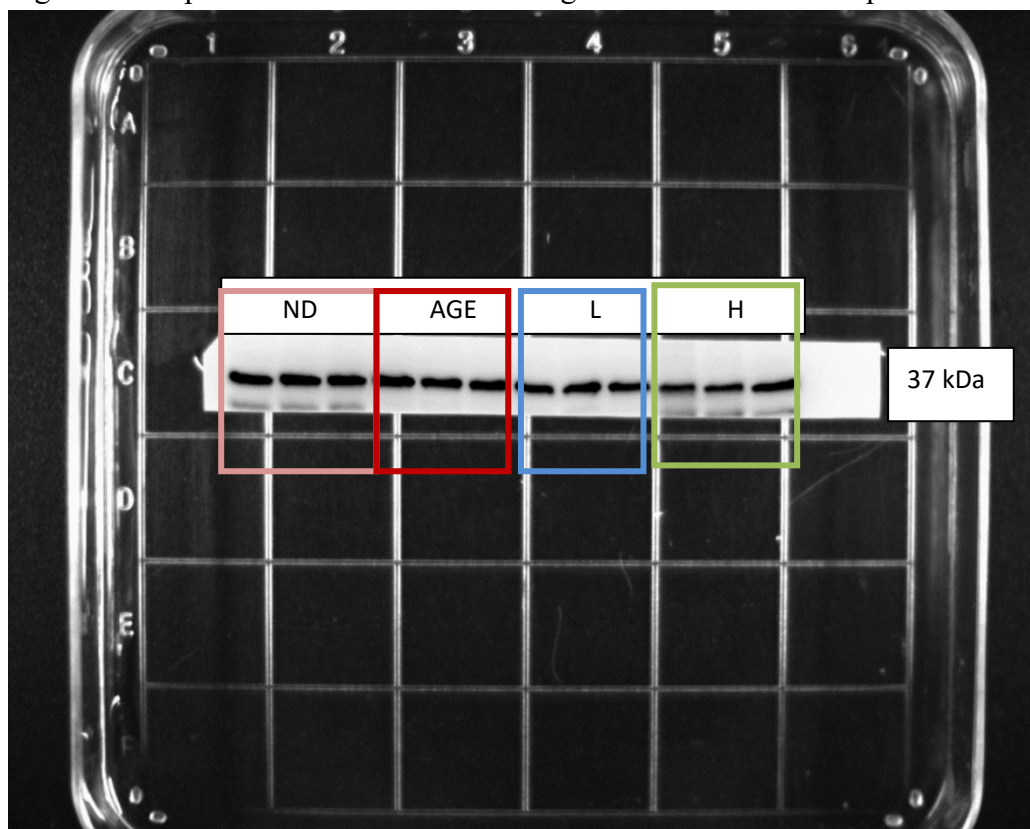

Supplement: d2fo02959f1.pdf [file d2fo02959f1.pdf]
